# Supplementary material
Source: ML conference proceedings conference paper supplement (https://proceedings.neurips.cc/paper_files/paper/2013/hash/6c14da109e294d1e8155be8aa4b1ce8e-Abstract.html)
Supplement: Supplementary file [file 6c14da109e294d1e8155be8aa4b1ce8e-Supplemental.zip]

---

# Supplemental materials for “Forgetful Bayes and Myopic Planning: Human learning and decision-making in a bandit setting”

---

**Shunan Zhang**

Department of Cognitive Science  
University of California, San Diego  
La Jolla, CA 92093  
s6zhang@ucsd.edu

**Angela J. Yu**

Department of Cognitive Science  
University of California, San Diego  
La Jolla, CA 92093  
ajyu@ucsd.edu

## 1 Distribution of model agreement over individual subjects

We illustrate how well the models fit different individuals’ decisions in Figure 1. We show the mean per-trial likelihood under each model, with the MAP estimate of the model parameters (fit across all subjects). The histogram shows that the model agreements for all models vary largely across individuals, suggesting large individual differences.

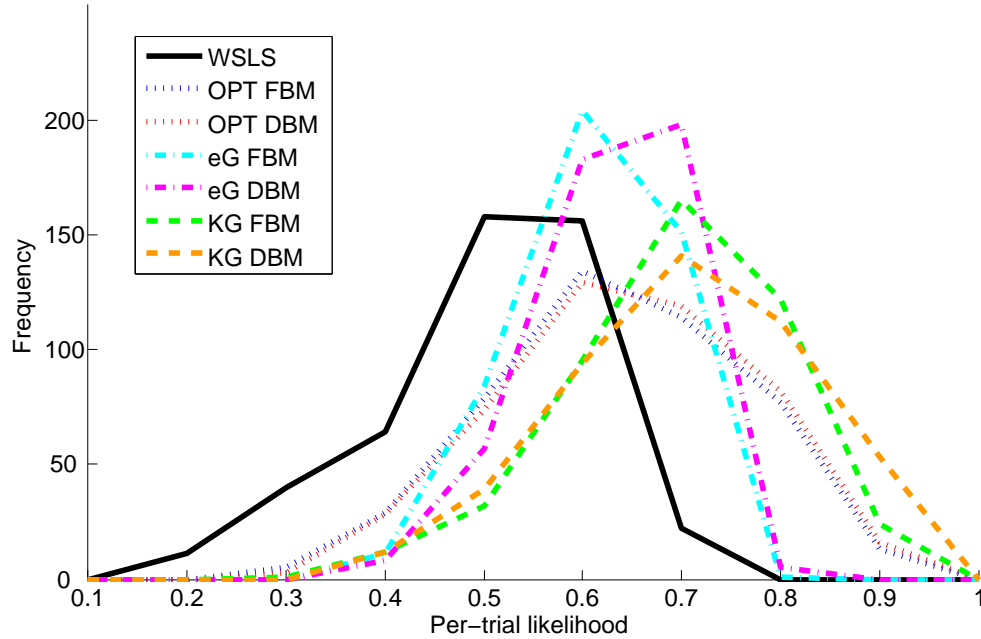

Figure 1: Model agreement distributions. x-axis: per-trial likelihood; y-axis: number of subjects
